# Supplementary material
Source: Springer Nature journal article supplement (https://www.springermedizin.de/resource/supplementary/12955_2010_700_MOESM1_ESM.pdf/9561134)
Supplement: MOESM1 [file 9561134]

**Items = 207**

|                   |                               |                  |                    |                       |                     |                               |
|-------------------|-------------------------------|------------------|--------------------|-----------------------|---------------------|-------------------------------|
| Cough<br>24       | Dyspnea<br>24                 | Forethought<br>8 | Sleep<br>8         | Mortality<br>22       | Exhaustion<br>18    | Emotional<br>Well-being<br>37 |
| Spirituality<br>5 | Social<br>Participation<br>13 | Finances<br>6    | Independence<br>11 | Sexual<br>Health<br>6 | Relationships<br>13 | Therapies<br>12               |

Apply item variance criterion

**Items = 125**

|                   |                              |                  |                   |                       |                    |                               |
|-------------------|------------------------------|------------------|-------------------|-----------------------|--------------------|-------------------------------|
| Cough<br>17       | Dyspnea<br>12                | Forethought<br>8 | Sleep<br>6        | Mortality<br>7        | Exhaustion<br>13   | Emotional<br>Well-being<br>19 |
| Spirituality<br>5 | Social<br>Participation<br>9 | Finances<br>5    | Independence<br>8 | Sexual<br>Health<br>4 | Relationships<br>6 | Therapies<br>6                |

Rasch analysis

**Items = 74**

|                              |               |                   |                       |                    |                 |                              |
|------------------------------|---------------|-------------------|-----------------------|--------------------|-----------------|------------------------------|
| Cough<br>6                   | Dyspnea<br>6  | Forethought<br>5  | Sleep<br>6            | Mortality<br>6     | Exhaustion<br>5 | Emotional<br>Well-being<br>7 |
| Social<br>Participation<br>5 | Finances<br>6 | Independence<br>5 | Sexual<br>Health<br>5 | Relationships<br>6 | Therapies<br>6  |                              |
